# Supplementary figures and images for: Reductive hydrothermal conversion of uranyl oxalates into UO2+x monitored by in situ XANES analyses
Source: Royal Society of Chemistry journal article supplement (doi:10.1039/d4dt01451k), 2024-01-01

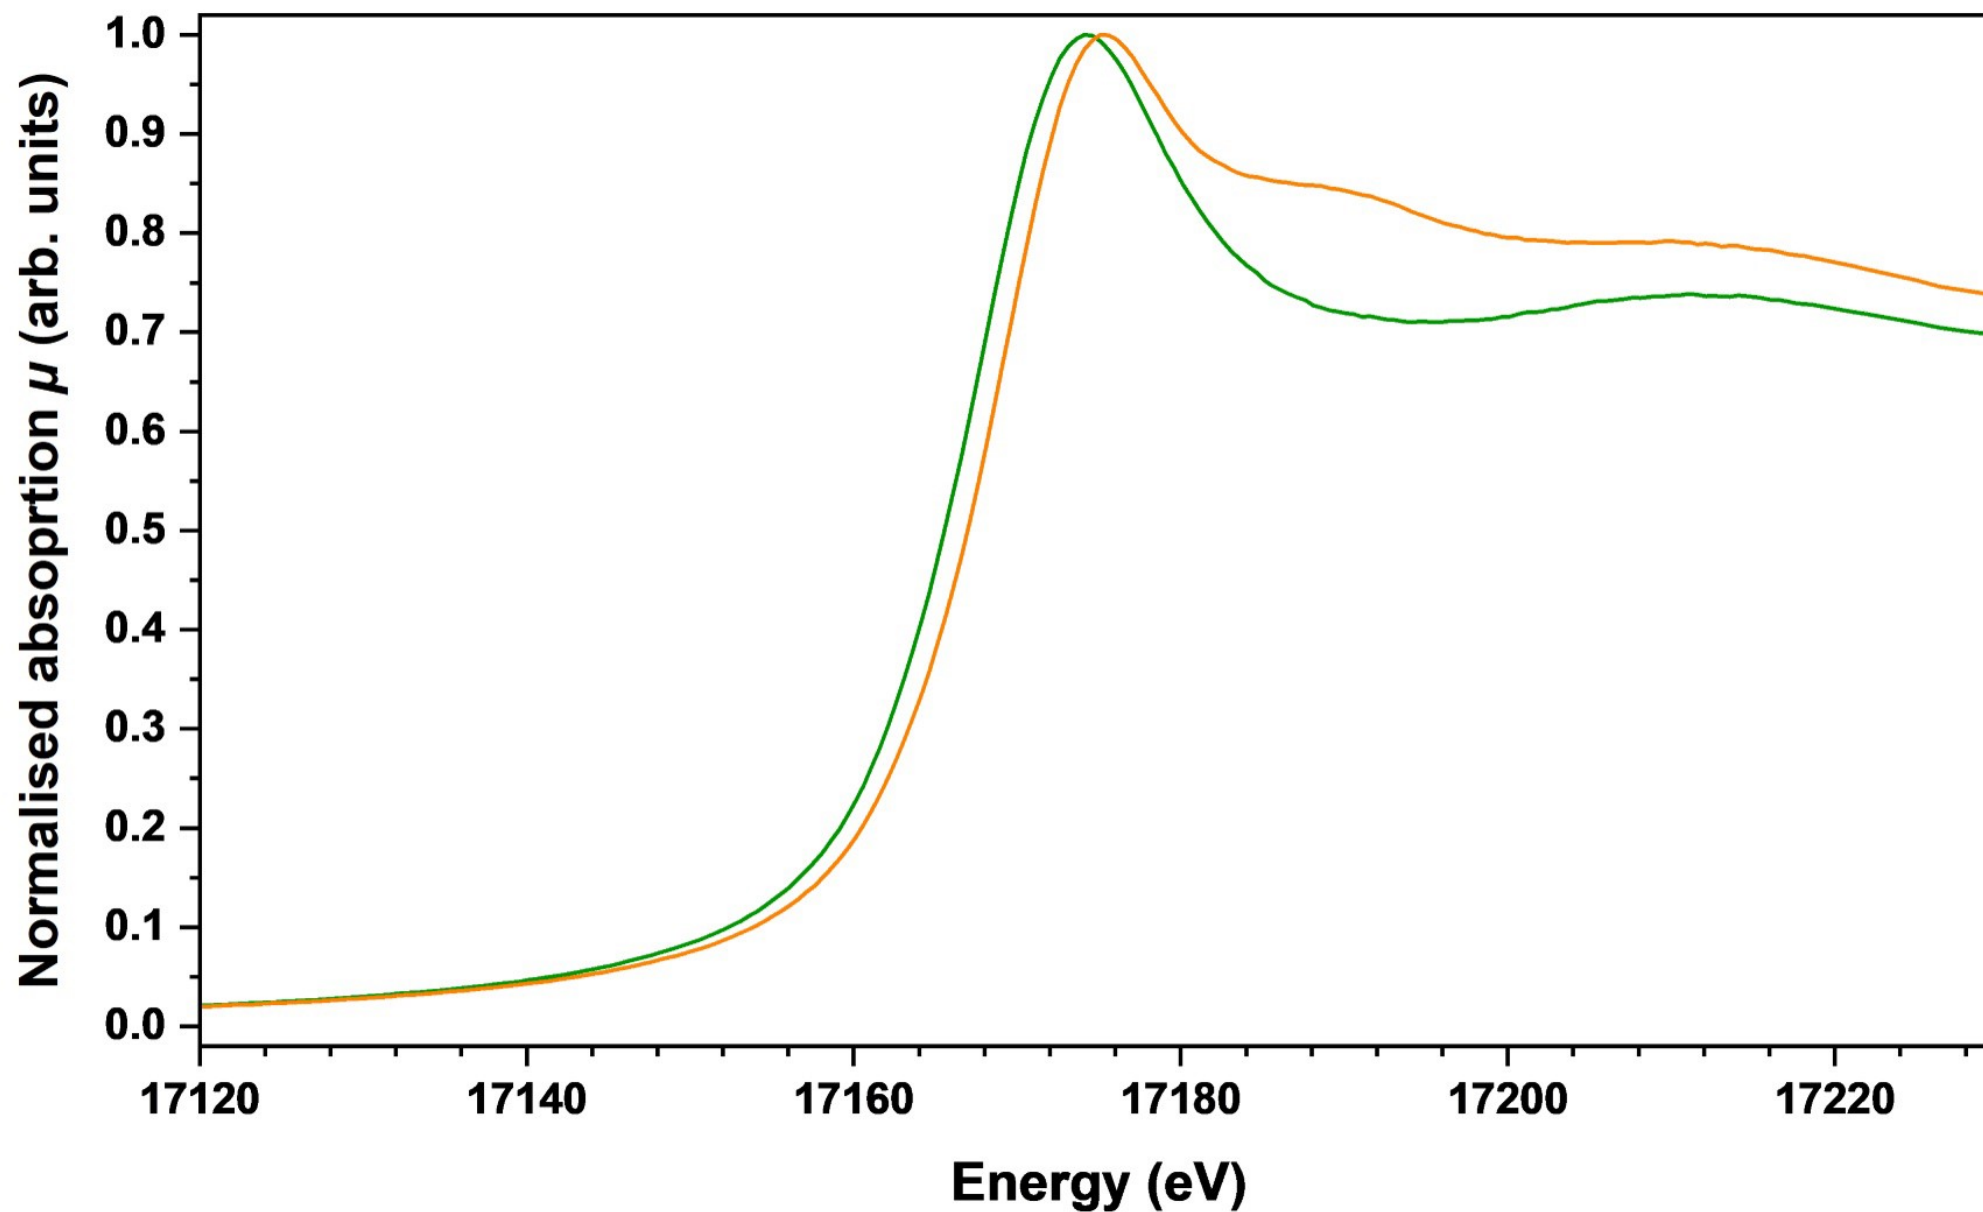

Supplement: d4dt01451k2.pdf [file d4dt01451k2.pdf]

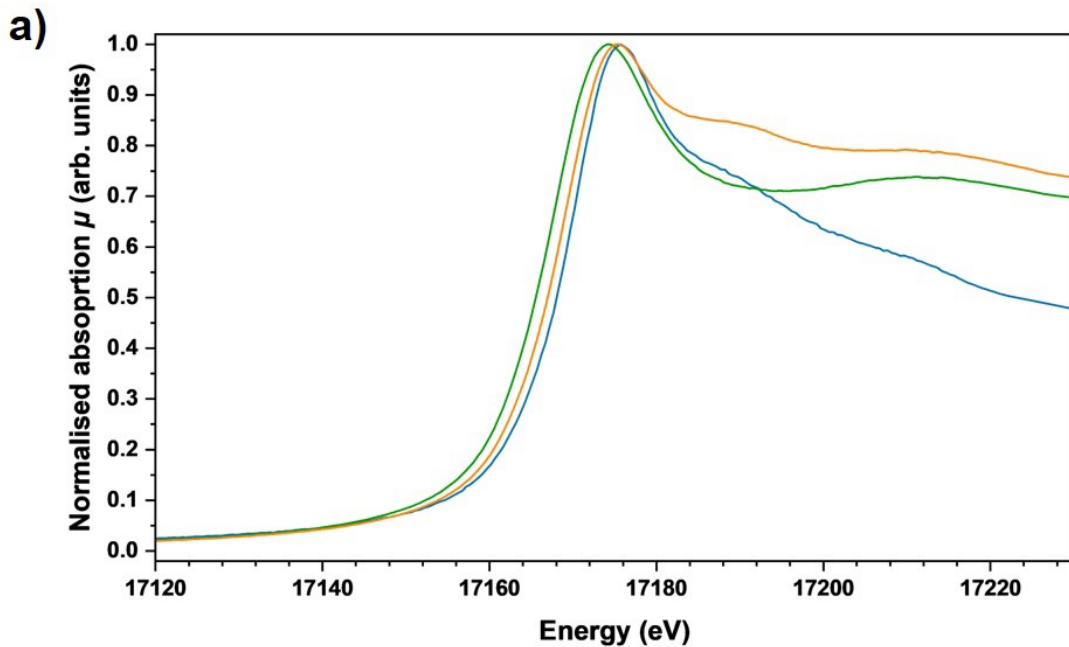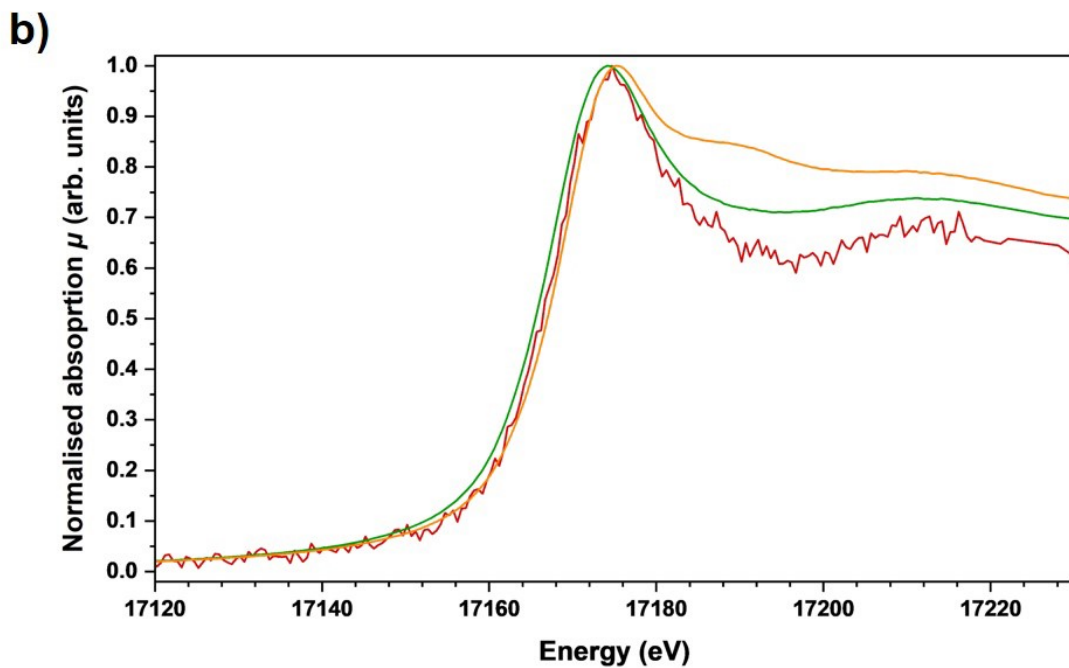

Supplement: d4dt01451k3.pdf [file d4dt01451k3.pdf]

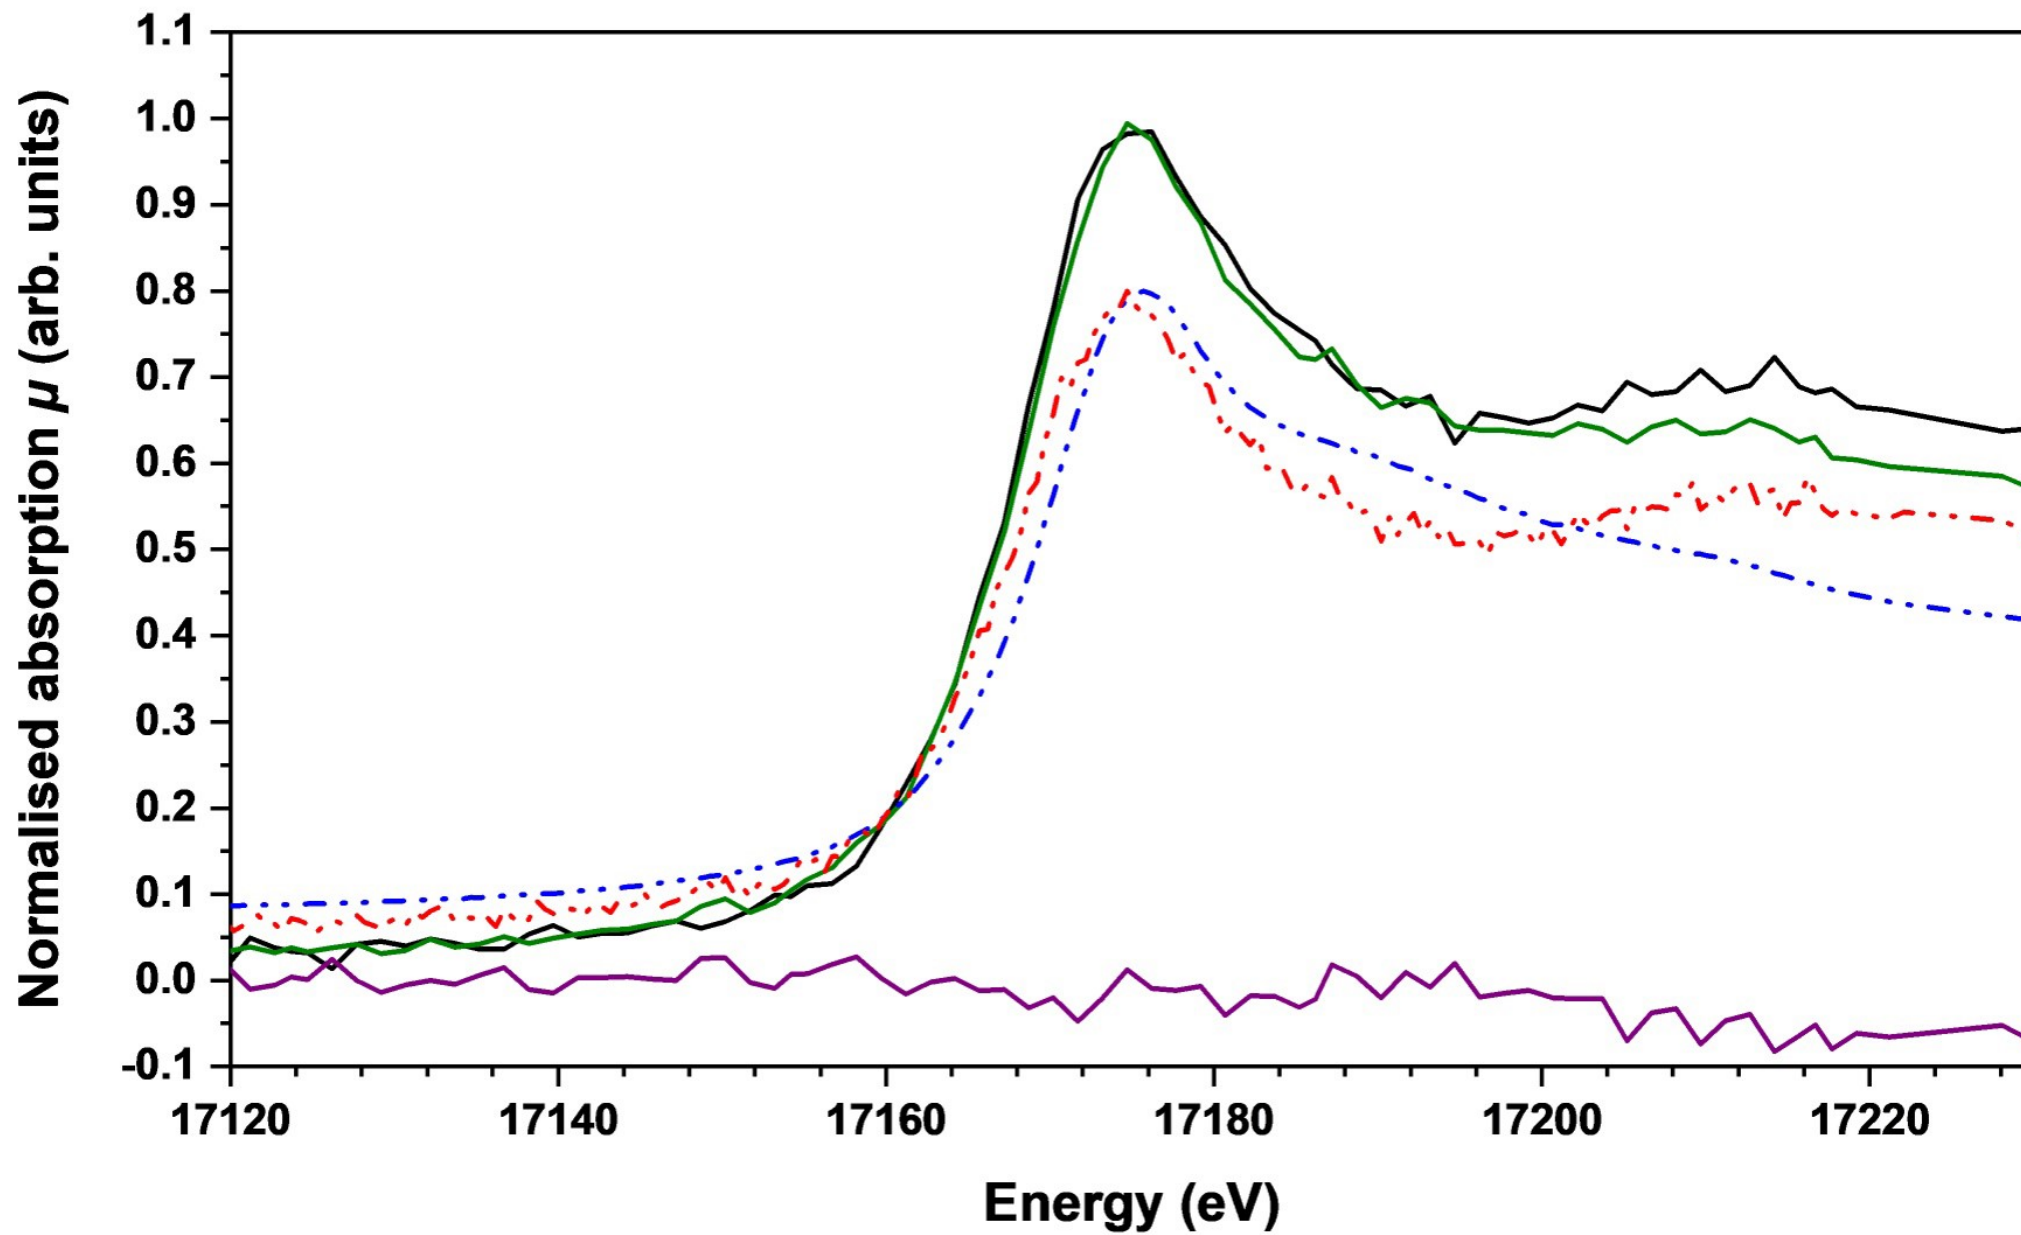

Supplement: d4dt01451k4.pdf [file d4dt01451k4.pdf]

a)

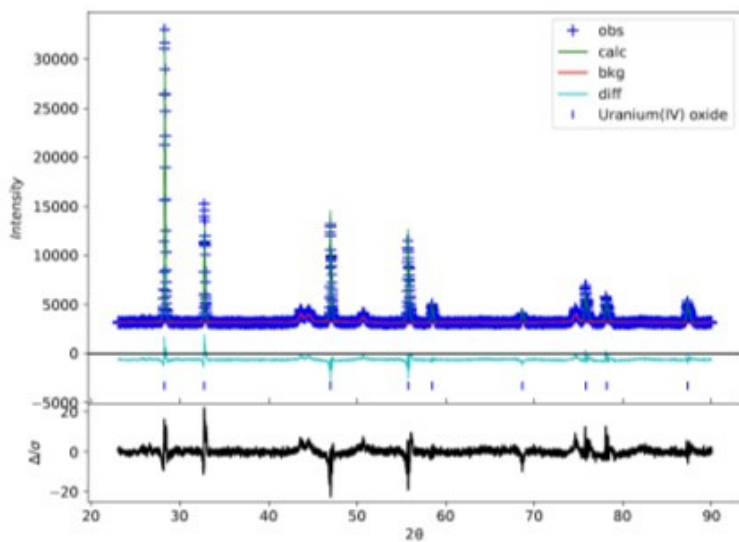

b)

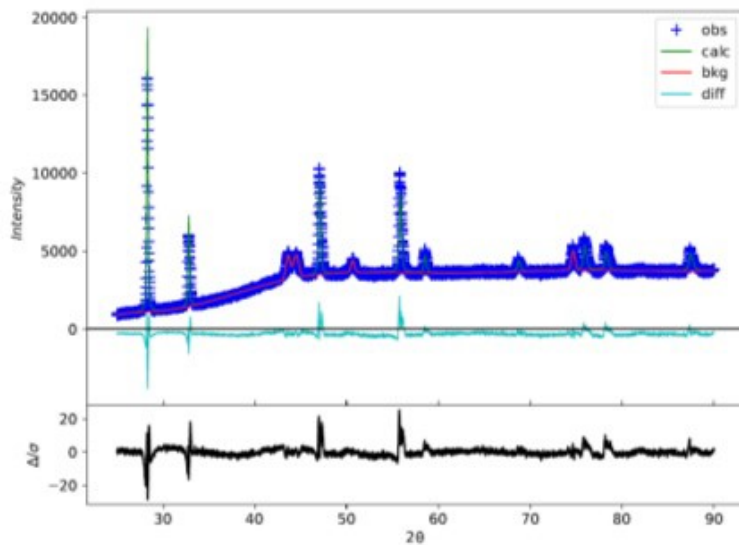

Supplement: d4dt01451k5.pdf [file d4dt01451k5.pdf]
